# Supplementary material for: Broadening the substrate range of serine palmitoyltransferase by protein engineering and applications to 3-keto-dihydrosphingosine analogs
Source: Royal Society of Chemistry journal article supplement (doi:10.1039/d4cy01019a), 2024-01-01
Supplement: d4cy01019a1.pdf [file d4cy01019a1.pdf]

# Supporting Information

## **Broadening the Substrate Range of Serine Palmitoyltransferase by Protein Engineering and Applications to 3-Keto- Dihydrospingosine Analogs**

Hyunjun Choe, Minsun Cha, Ahram Kim and Jon D. Stewart \*

Department of Chemistry, 126 Sisler Hall, University of Florida, Gainesville, FL 32611 USA

Phone & Fax 352.846.0743, E-mail [jds2@chem.ufl.edu](mailto:jds2@chem.ufl.edu)

\*Author to whom correspondence should be addressed

ATGACCGAAGCAGCAGCTCAGCCTCATGCACTGCCGGCAGATGCTCCGGACATT  
GCTCCGGAACGTGATCTGTTGTCTAAGTTCGATGGATTGATCGCCGAGCGCCAGA  
AACTTCTGGATTCCGGTGTCACTGATCCGTTCGCTATTGTCATGGAGCAGGTAAA  
ATCTCCAACGGAAGCTGTGATTCGCGGAAAAGATACCATCCTGCTTGGCACCTAT  
AATTACATGGGCATGACCTTCGATCCGGACGTAATTGCAGCAGGAAAGGAGGCC  
TTGGAGAAATTTGGTTCGGCACCAATGGCAGCCGTATGTTAAACGGTACTTTTC  
ATGACCACATGGAAGTCGAACAAGCACTGCGTGACTTTTACGGTACTACGGGTG  
CTATCGTGTTCTCTACTGGCTACATGGCGAACCTGGGCATCATCTCGACTCTGGC  
TGGAAGGGGGAGTACGTAATCCTGGATGCAGACAGCCATGCGTCAATCTACGA  
TGGTTGTCAGCAAGGAAATGCGGAGATCGTGCGTTTTTCGCCACAACAGCGTAGA  
AGACCTGGATAAGCGCTTGGGACGTCTTCCAAAGGAACCTGCAAAACTGGTTGT  
CCTTGAAGGAGTGTACTCTATGTTGGGTGACATTGCTCCGCTTAAGGAGATGGTC  
GCTGTGCTAAGAAGCATGGAGCAATGGTACTGGTTGACGAAGCACACAGCATG  
GGTTTCTTCGGTCCAAACGGTCGTGGAGTGTACGAGGCTCAGGGACTTGAAGGA  
CAGATCGACTTCGTTGTTGGTACCTTCAGCAAATCCGTTGGTACTGTAGGTGGAT  
TCGTAGTGAGCAACCACCCGAAGTTCGAAGCTGTGCGTCTTGCTTGCCGTCCGTA  
CATCTTCACGGCATCTCTCCTCCAAGCGTCGTGGCCACTGCAACTACCTCTATCC  
GCAAACTGATGACTGCCCATGAAAAACGCGAGCGCTTATGGAGCAACGCACGCG  
CATTACACGGAGGTCTTAAGGCTATGGGGTTCGTTTGGGAACTGAAACCTGCGA  
CTCGGCTATCGTTGCTGTCATGTTAGAGGATCAGGAACAAGCTGCTATGATGTGG  
CAGGCCTTGCTGGACGGAGGATTATACGTGAATATGGCCCGTCCACCTGCAACTC  
CTGCAGGAACCTTCTTGTGCGTTGTTCCATTTGTGCGGAACACACCCAGCACA  
AATCCAGACGGTATTGGGGATGTTTCAAGCAGCTGGTTCGTGCAGTCGGTGTCATT  
GGC

**Figure S1. Sequence optimized *SpSPTase* gene.**

*Nde*I restriction site: CATATG

*Xho*I restriction site: CTCGAG

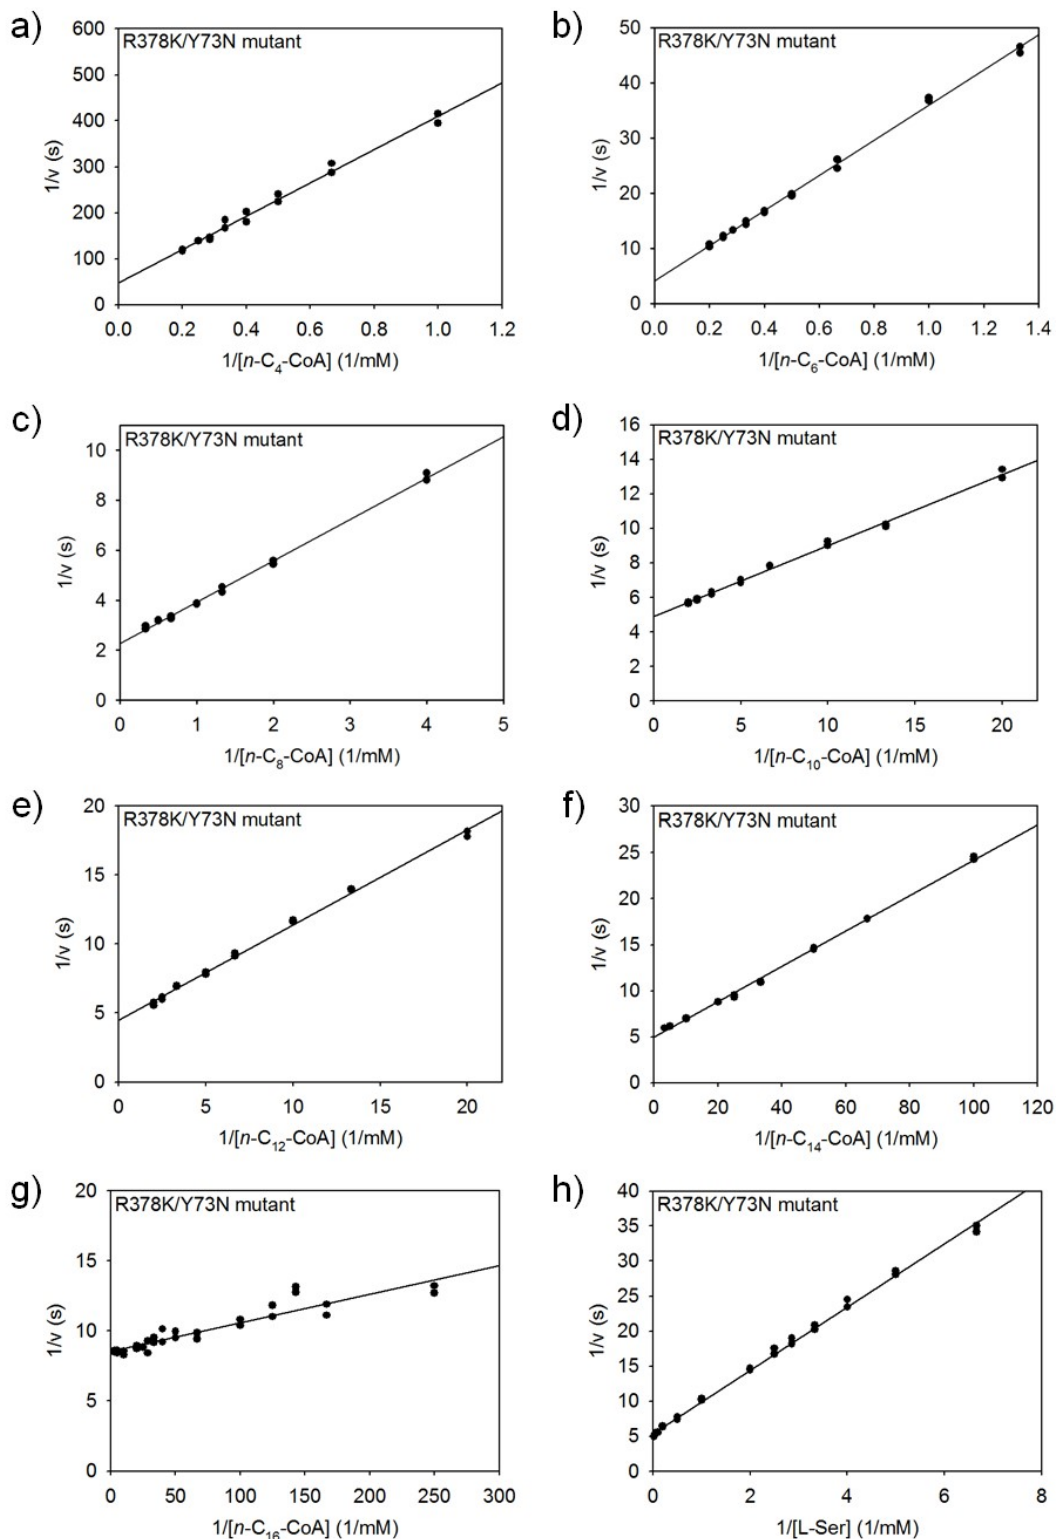

**Figure S2. Lineweaver-Burk plots for the production of KDS analogues from L-Ser and Acyl-CoA's ( $n\text{-C}_4\text{-CoA}$  to  $n\text{-C}_{16}\text{-CoA}$ ) by R378K/Y73N *SpSPTase*. Enzyme reactions with variable substrates  $n\text{-C}_4\text{-CoA}$  (a),  $n\text{-C}_6\text{-CoA}$  (b),  $n\text{-C}_8\text{-CoA}$  (c),  $n\text{-C}_{10}\text{-CoA}$  (d),  $n\text{-C}_{12}\text{-CoA}$  (e),  $n\text{-C}_{14}\text{-CoA}$  (f),  $n\text{-C}_{16}\text{-CoA}$  (g), and L-Ser (h).**

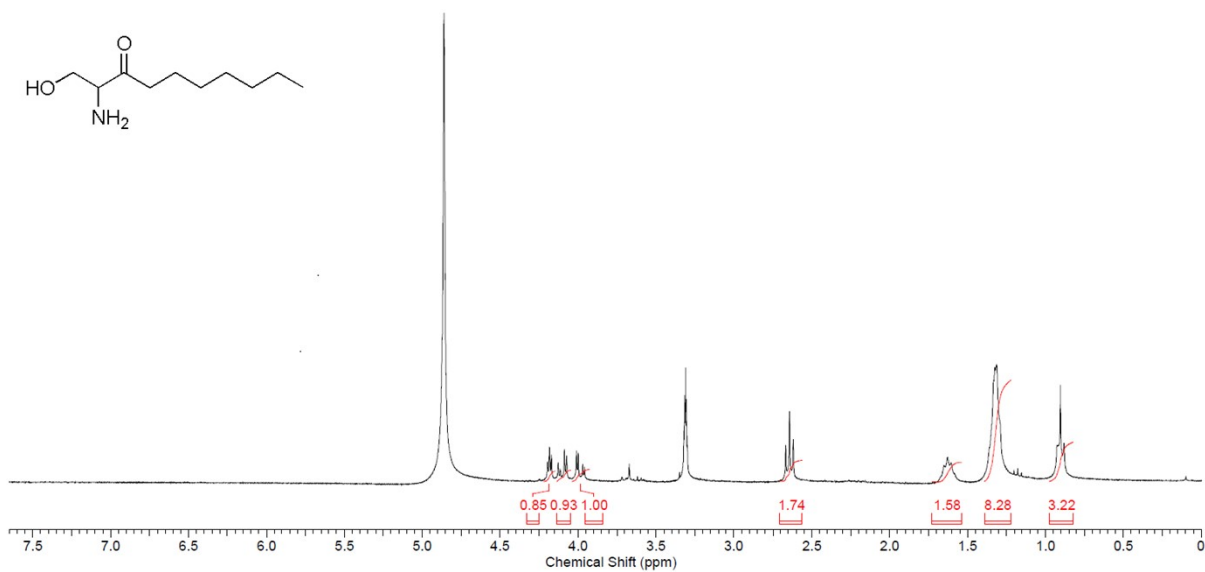

**Figure S3. Production of 3-keto-C<sub>10</sub>-dihydrosphingosine from L-Ser and *n*-C<sub>8</sub>-CoA by R378K/Y73N *Sp*SPTase.**

<sup>1</sup>H NMR spectra of 3-keto-C<sub>10</sub>-dihydrosphingosine were recorded at 300 MHz at 25 °C and calibrated against the residual proton signal of the solvent as internal references (CD<sub>3</sub>OD: δ<sub>H</sub> = 3.31 ppm).

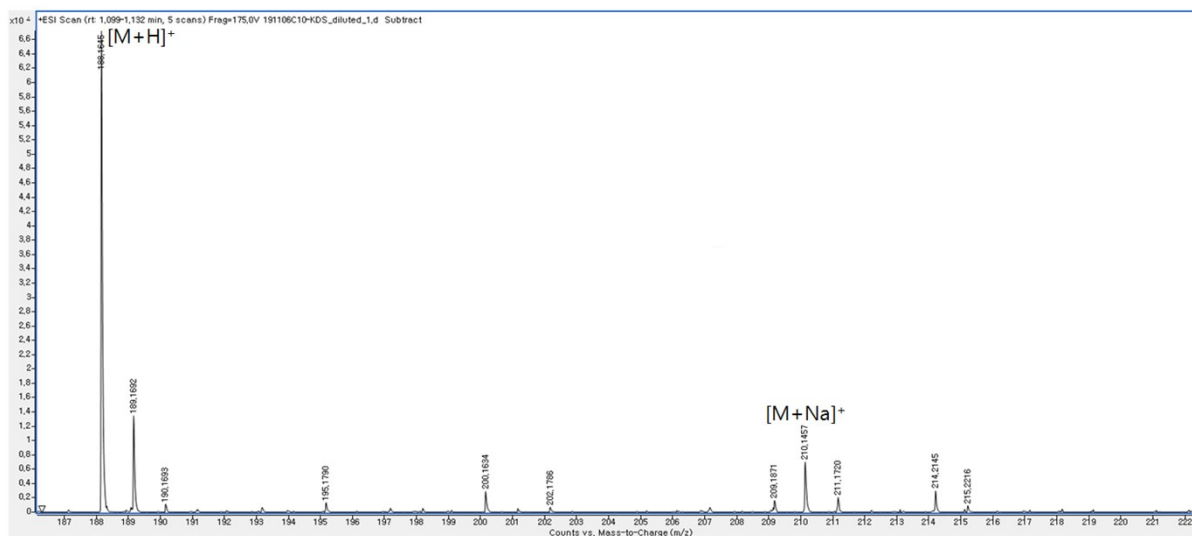

**Figure S4. MS analysis of 3-keto-C<sub>10</sub>-dihydrosphingosine synthesized from L-Ser and *n*-C<sub>8</sub>-CoA by R378K/Y73N *Sp*SPTase.** The formation of the product was confirmed as previously described.<sup>1</sup> 3-Keto-C<sub>10</sub>-dihydrosphingosine formation was corroborated ESI MS (positive mode). C<sub>10</sub>H<sub>21</sub>NO<sub>2</sub> calcd [M + H]<sup>+</sup> = 188.1645, [M + Na]<sup>+</sup> = 210.1464; obsd: 188.1645 (Δ = 0 ppm), 210.1457 (Δ = 3.3 ppm).

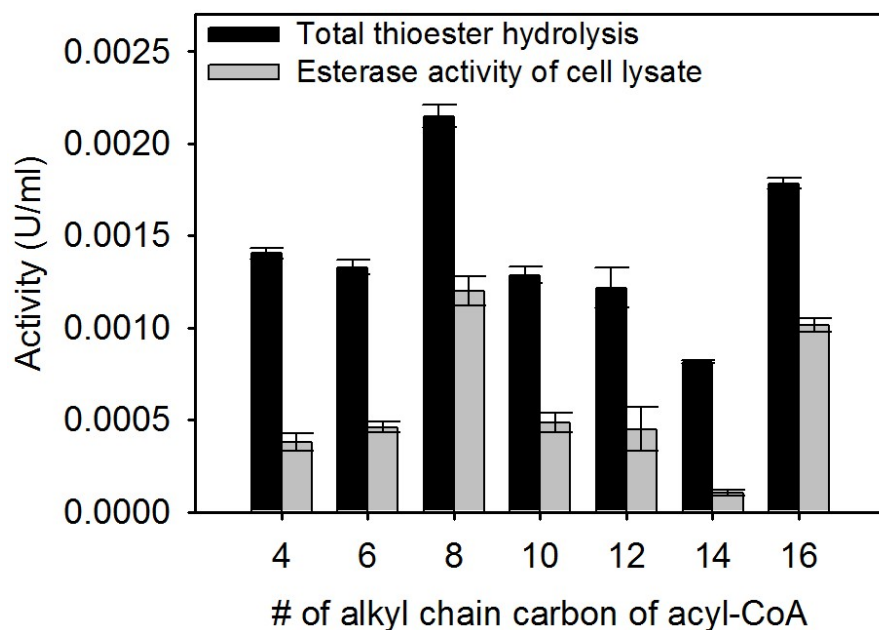

**Figure S5. Thioesterase activities of BL21-Gold (DE3) for *n*-acyl-CoA's.** The cell lysate (10  $\mu$ l) was added to 190  $\mu$ l of a reaction buffer (500 mM  $KP_i$ , 150 mM NaCl, 20 mM L-Ser, 10  $\mu$ M PLP, 0.3 mM Ellman's reagent, 1 mM EDTA, pH 7.5) containing *n*-acyl-CoA's (0.5 mM). The reactions were incubated at 37  $^{\circ}$ C, and the thioester bond hydrolysis of *n*-acyl-CoA's was determined by monitoring the absorbance at 412 nm for 2 h. The total thioester hydrolysis includes the rates of self-hydrolysis.

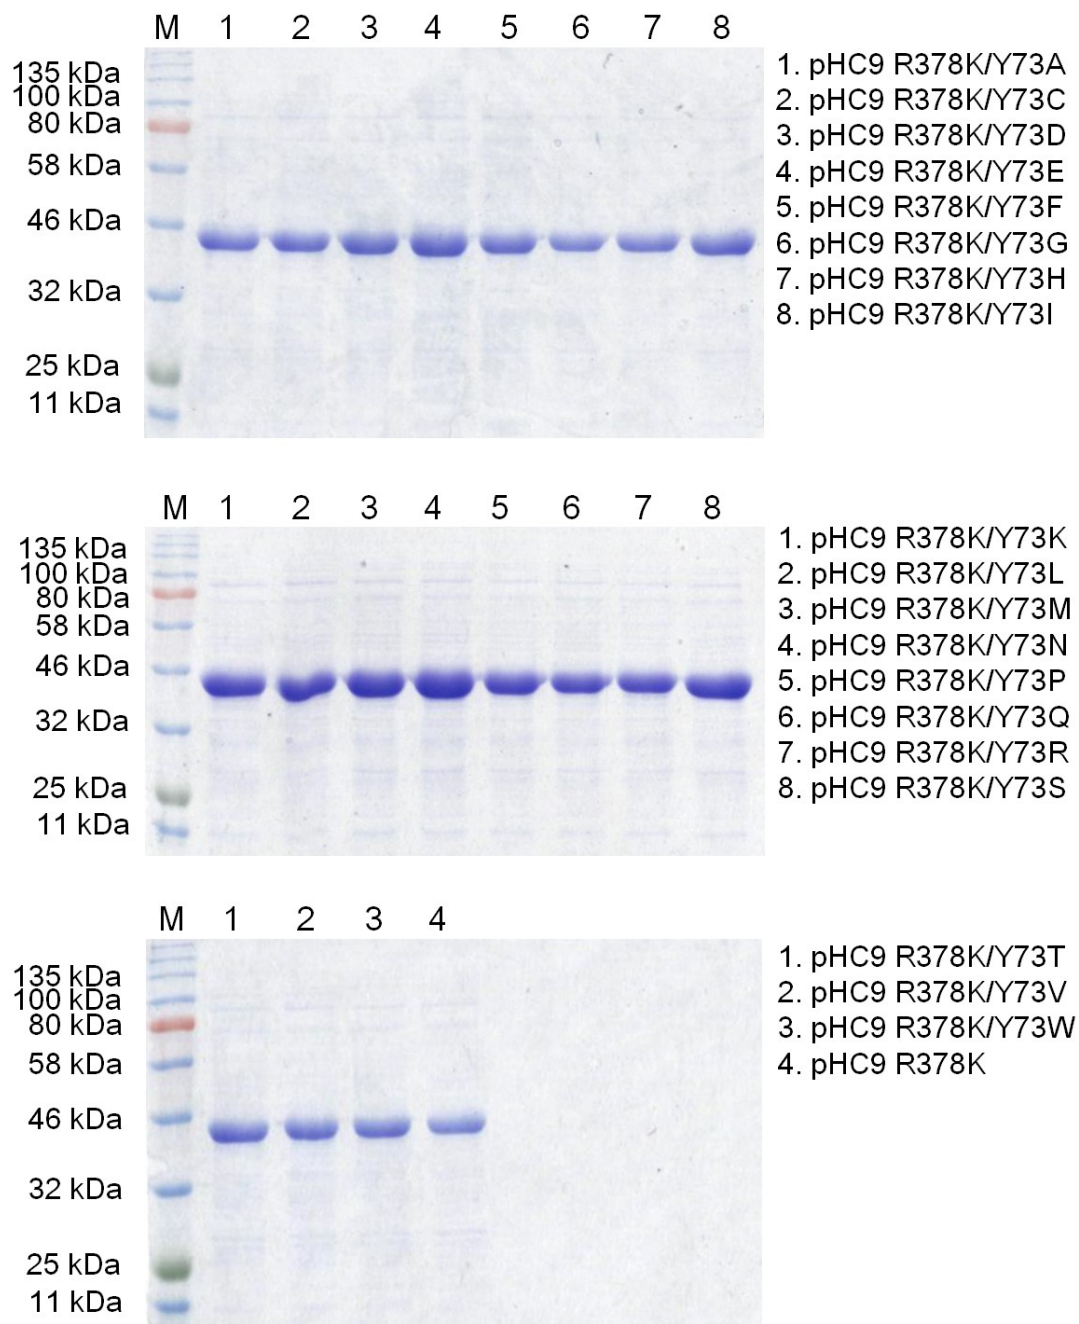

M: Color Prestained Protein Standard, broad range (11–245 kDa) (New England Biolabs)

**Figure S6. SDS-PAGE analysis of *Sp*SPTase R378K/Y73X mutants expressed under autoinduction conditions.**

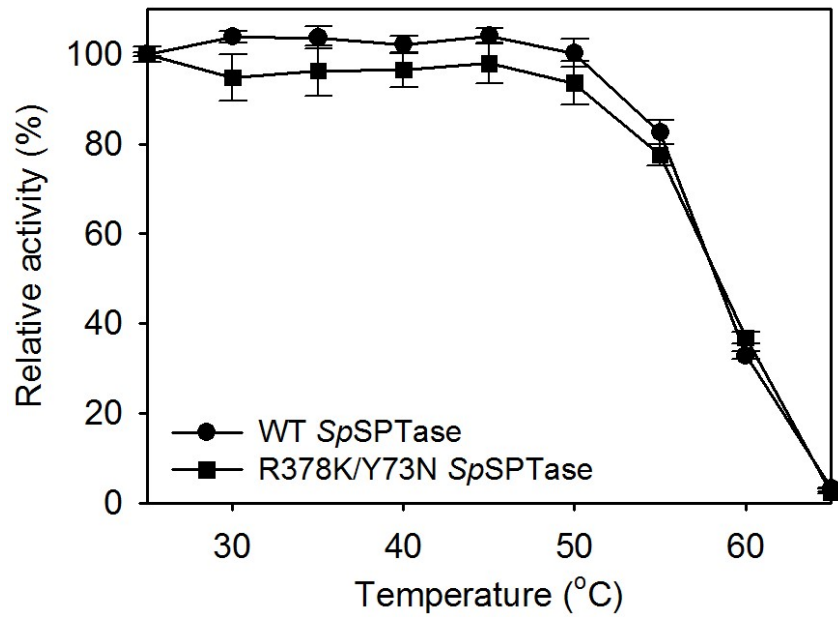

**Figure S7. Thermostability of wild-type and R378K/Y73N *SpSPTases*.** *SpSPTases* (0.2 mg/ml) were incubated at 25-65 °C for 30 min, and then 4 °C for 10 min. The incubated enzyme solution (10  $\mu$ l or 2  $\mu$ g) was added to a reaction buffer (500 mM  $KP_i$ , pH 7.5, 150 mM NaCl, 20 mM L-Ser, 10  $\mu$ M PLP, 1 mM EDTA, 0.15 mM *n*-C<sub>16</sub>-CoA, and 0.3 mM DTNB). Error bars represent standard deviation of triplicate measurement.



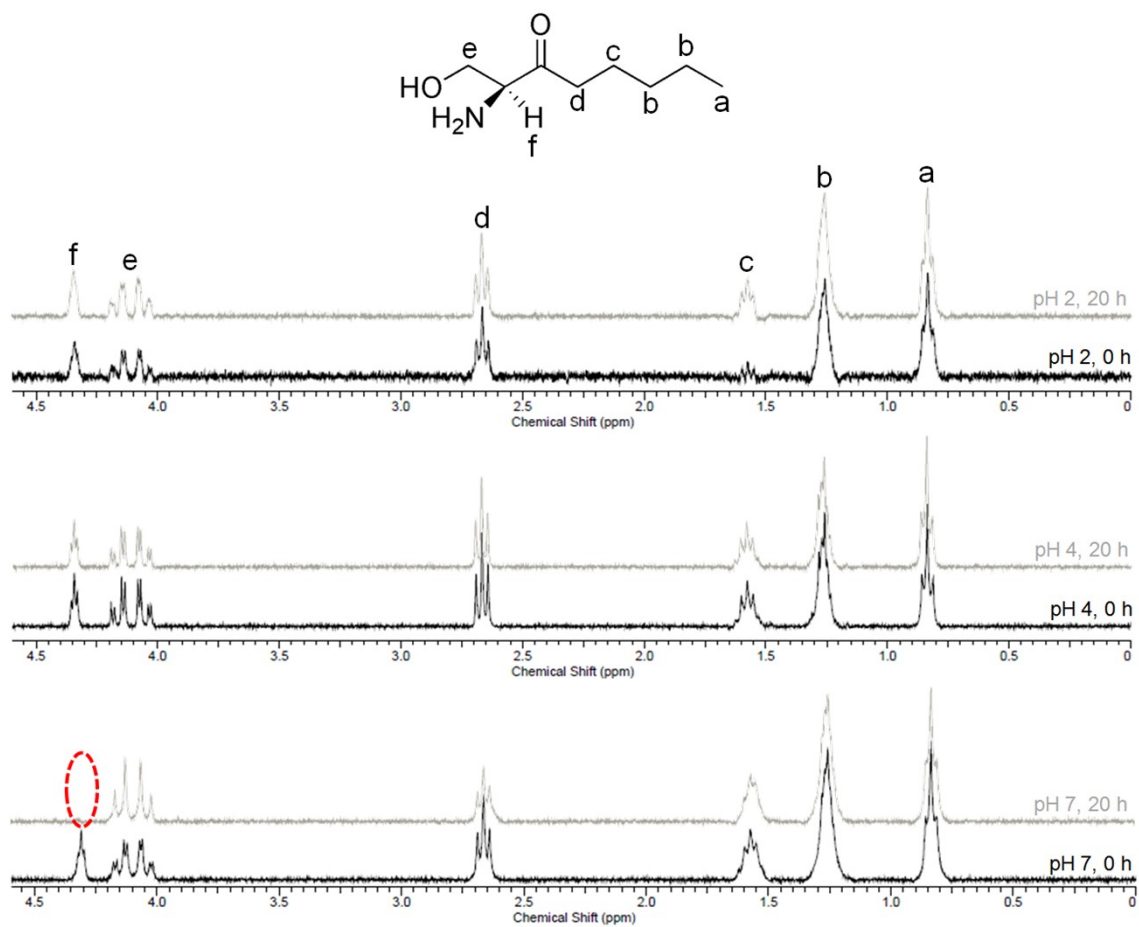

**Figure S8. pH-dependent racemization of 3-keto-C<sub>8</sub>-dihydrospingosine.** 3-keto-C<sub>8</sub>-dihydrospingosine (C<sub>8</sub>-KDS) was synthesized as described previously.<sup>2</sup> The analogue was dissolved in either a deuterated 20 mM KP<sub>i</sub> buffer for pH 7 or D<sub>2</sub>O for pH 2 and 4. The solutions were incubated in the dark at rt. for 20 h, and the exchange of the α-proton was determined by comparing <sup>1</sup>H NMR data.

**Table S1. Degenerate primers (NNK and MNN) used for site saturation mutagenesis.**

| Mutants | Forward primers (NNK)                      | Reverse primers (MNN)                      | Q <sub>pool</sub> |
|---------|--------------------------------------------|--------------------------------------------|-------------------|
| F47X    | TCACTGATCCGNNKGCTATTGTCATGGAGCAGGTA AAAATC | ATGACAATAGCMNNCGGATCAGTGACACCGGAATCCAGAA   | 0.87              |
| Y73X    | TGCTTGGCACCNKAATTACATGGGCATGACCTTCGATCC    | CCCATGTAATTMNNGGTGCCAAGCAGGATGGTATCTTTTC   | 0.86              |
| G101X   | CCGGCACCAATNNKAGCCGTATGTTAAACGGTACTTTTCA   | AACATACGGCTMNNATTGGTGCCGGAACCAAATTTCTCCA   | 0.84              |
| S102X   | GCACCAATGGCNNKCGTATGTTAAACGGTACTTTTCATGA   | TTTAAACATACGMNNGCCATTGGTGCCGGAACCAAATTTCT  | 0.93              |
| M104X   | ATGGCAGCCGTNNKTAAACGGTACTTTTCATGACCACAT    | GTACCGTTTTAAMNNACGGCTGCCATTGGTGCCGGAACCAA  | 0.79              |
| L105X   | GCAGCCGTATGNNKAACGGTACTTTTCATGACCACATGGA   | AAAAGTACCGTTMNNCATAACGGCTGCCATTGGTGCCGGAAC | 0.88              |
| A160X   | CAGACAGCCATNNKTCAATCTACGATGGTTGTCAGCAAGG   | TCGTAGATTGAMNNATGGCTGTCTGCATCCAGGATTACGT   | 0.88              |
| S206X   | AAGGAGTGTACNNKATGTTGGGTGACATTGCTCCGCTTAA   | TCACCCAACATMNNGTACTCCTTCAAGGACAACCAGTT     | 0.82              |
| M207X   | GAGTGTACTCTNNKTGGGTGACATTGCTCCGCTTAAGGA    | ATGTCACCCAAMNNAGAGTACTCCTTCAAGGACAACCA     | 0.93              |
| F293X   | GTCCGTACATCNNKACGGCATCTCTCCTCCAAGCGTCGT    | AGAGATGCCGTMNNGATGTACGGACGGCAAGCAAGACGCA   | 0.73              |
| T294X   | CGTACATCTTCNNKGCATCTCTCCTCCAAGCGTCGTGGC    | GGAAGAGATGCMNNGAAGATGTACGGACGGCAAGCAAGAC   | 0.81              |
| S296X   | TCTTCACGGCANNKCTCCTCCAAGCGTCGTGGCCACTGC    | CTTGGAGGAAGMNN TGCCGTGAAGATGTACGGACGGCAAG  | 0.86              |
| N375X   | GATTATACGTGNNKATGGCCAAACCACCTGCAACTCCTGC   | GGTTTGGCCATMNNCACGTATAATCCTCCGTCCAGCAAGG   | 0.86              |
| M376X   | TATACGTGAATNNKGCCAAACCACCTGCAACTCCTGCAGG   | GGTGGTTTGGCMNNATTCACGTATAATCCTCCGTCCAGCA   | 0.89              |
| A377X   | ACGTGAATATGNNKCGTCCACCTGCAACTCCTGCAGGAAC   | GCAGGTGGACGMNNCATATTCACGTATAATCCTCCGTCCA   | 0.86              |
| P379X   | ATATGGCCAAANNKCCTGCCACCTGCAACTCCAACTCCTG   | GGAGTTGCAGGMNN TTTGGCCATATTCACGTATAATCCTC  | 0.82              |
| P380X   | TGGCCAAACCANNKGCAACTCCTGCAGGAACCTTCTTGTT   | GCAGGAGTTGCMNN TGTTTGGCCATATTCACGTATAATC   | 0.91              |
| A381X   | CCCGTCCACCTNNKACTCCTGCAGGAACCTTCTTGTTGCG   | CCTGCAGGAGTMNNAGGTGGACGGGCCATATTCACGTATA   | 0.89              |
| T382X   | AACCACCTGCANNKCCTGCAGGAACCTTCTTGTTGCGTTG   | GTTCTGCAGGMNN TGAGGTGGTTTGGCCATATTCACGT    | 0.80              |
| R390X   | CCTTCTTGTTGNKGTGCCATTTGTGCGGAACACACCCC     | CAAATGGAACAMNNCAACAAGAAGGTTCTCCTGCAGGAGTTG | 0.86              |

**Table S2. Primers used for site saturation mutagenesis at Tyr73 position.**

| Mutants | Forward primers                   | Reverse primers                  |
|---------|-----------------------------------|----------------------------------|
| Y73A    | CTTGGCACCGCTAATTACATGGGCATGACCTT  | CATGTAATTAGCGGTGCCAAGCAGGATGGTAT |
| Y73C    | CTTGGCACCTGTAATTACATGGGCATGACCTT  | CATGTAATTACAGGTGCCAAGCAGGATGGTAT |
| Y73D    | CTTGGCACCGATAATTACATGGGCATGACCTT  | CATGTAATTATCGGTGCCAAGCAGGATGGTAT |
| Y73E    | CTTGGCACCGAAAATTACATGGGCATGACCTT  | CATGTAATTTTCGGTGCCAAGCAGGATGGTAT |
| Y73F    | CTTGGCACCTTCAATTACATGGGCATGACCTT  | CATGTAATTGAAGGTGCCAAGCAGGATGGTAT |
| Y73G    | CTTGGCACCGGTAATTACATGGGCATGACCTT  | CATGTAATTACCGGTGCCAAGCAGGATGGTAT |
| Y73H    | CTTGGCACCCACAATTACATGGGCATGACCTT  | CATGTAATTGTGGGTGCCAAGCAGGATGGTAT |
| Y73I    | CTTGGCACCATCAATTACATGGGCATGACCTT  | CATGTAATTGATGGTGCCAAGCAGGATGGTAT |
| Y73K    | CTTGGCACCAAAAATTACATGGGCATGACCTT  | CATGTAATTTTGGTGCCAAGCAGGATGGTAT  |
| Y73L    | CTTGGCACCTTAAATTACATGGGCATGACCTT  | CATGTAATTTAAGGTGCCAAGCAGGATGGTAT |
| Y73M    | CTTGGCACCATGAATTACATGGGCATGACCTT  | CATGTAATTCATGGTGCCAAGCAGGATGGTAT |
| Y73N    | CTTGGCACCAATAATTACATGGGCATGACCTT  | CATGTAATTATTGGTGCCAAGCAGGATGGTAT |
| Y73P    | CTTGGCACCCCTAATTACATGGGCATGACCTT  | CATGTAATTAGGGGTGCCAAGCAGGATGGTAT |
| Y73Q    | CTTGGCACCCAAAATTACATGGGCATGACCTT  | CATGTAATTTTGGGTGCCAAGCAGGATGGTAT |
| Y73R    | CTTGGCACCCGCAATTACATGGGCATGACCTT  | CATGTAATTGCGGGTGCCAAGCAGGATGGTAT |
| Y73S    | CTTGGCACCCAGTAATTACATGGGCATGACCTT | CATGTAATTACTGGTGCCAAGCAGGATGGTAT |
| Y73T    | CTTGGCACCCAGTAATTACATGGGCATGACCTT | CATGTAATTCGTGGTGCCAAGCAGGATGGTAT |
| Y73V    | CTTGGCACCCGTCAATTACATGGGCATGACCTT | CATGTAATTGACGGTGCCAAGCAGGATGGTAT |
| Y73W    | CTTGGCACCTGGAATTACATGGGCATGACCTT  | CATGTAATTCCAGGTGCCAAGCAGGATGGTAT |

## Reference

1. Choe, H.; Cha, M. S.; Stewart, J. D., Expanding the acyl-CoA chain length tolerance of *Sphingomonas paucimobilis* serine palmitoyltransferase by Mutating Arg 378. *Enzyme Microb. Technol.* **2020**, *137*, 109515.
2. Ishijima, H.; Uchida, R.; Ohtawa, M.; Kondo, A.; Nagai, K.; Shima, K.; Nonaka, K.; Masuma, R.; Iwamoto, S.; Onodera, H.; Nagamitsu, T.; Tomoda, H., Simplifungin and valsafungins, antifungal antibiotics of fungal origin. *J. Org. Chem.* **2016**, *81*, 7373-7383.
